# Supplementary material
Source: PubMed Central journal article supplement (PMC5520462)

## Supplemental Figures and Figure Legends

### Supplementary Figure S1. *Rip1*<sup>K45A/K45A</sup> or *Rip1*<sup>Δ/Δ</sup> mice are viable and healthy.

(a) Sequencing results of *Rip1*<sup>K45A/K45A</sup> mice. (b) Schematic map of RIP1 and sequencing results of *Rip1*<sup>Δ/Δ</sup> mice. (c) Representative photographs of 8-week-old WT and *Rip1*<sup>Δ/Δ</sup> mice. (d) RIP1 protein levels in different tissues including thymus, lung, liver and spleen from WT, *Rip1*<sup>K45A/K45A</sup> and *Rip1*<sup>Δ/Δ</sup> mice.

### Supplementary Figure S2. *Rip1*<sup>Δ/Δ</sup> mice show normal B/T cells development.

(a) Flow cytometric analysis of the cells isolated from thymus, lymph nodes, and spleen of 8 weeks *Rip1*<sup>Δ/Δ</sup> mouse and littermate WT control mouse. (b) Absolute organ cellularity of thymus, lymph nodes, and spleen from 8 weeks *Rip1*<sup>Δ/Δ</sup> mice (n=3) and littermate WT control mice (n=3). Error bars represent mean ± SD.

### Supplementary Figure S3. RIP1<sup>Δ</sup> interacts well with RIP3.

Immunoprecipitation of RIP1<sup>Δ</sup> with RIP3 in 293T cells, wild-type of RIP1 as positive control.

### Supplementary Figure S4. RIP1<sup>Δ</sup> does not influence NF-κB and MAPK signaling pathways.

BMDMs from WT and *Rip1*<sup>Δ/Δ</sup> mice were treated with LPS (100ng/ml) for different time periods as indicated, and the lysates were analyzed by western blot for p-IκB, p-JNK, JNK, p-P38, P38, p-P65, ERK, p-ERK, RIP1 and beta-actin.

### Supplementary Figure S5. RIP1<sup>Δ</sup> as well as RIP1<sup>K45A</sup> block apoptosis induced by TNF/Smac.

(a) MDFs from wild-type, *Rip1*<sup>-/-</sup>, *Rip1*<sup>K45A/K45A</sup> and *Rip1*<sup>Δ/Δ</sup> mice were treated for 24 hour as indicated with TNF (30ng/ml), CHX (10ug/ml). Cell viability was determined by measuring intracellular ATP levels with a Cell Titer-Glo Luminescent Cell Viability Assay kit. \*\*\*P<0.0001 by Student's *t*-test. Data are represented as the mean ± SEM of three independent experiments. (b) MDFs from wild-type, *Rip1*<sup>-/-</sup>,

*Rip1*<sup>K45A/K45A</sup> and *Rip1*<sup>Δ/Δ</sup> mice were treated for 24 hour as indicated with TNF (30ng/ml), Smac mimetic (1uM). Cell viability was determined by measuring intracellular ATP levels with a Cell Titer-Glo Luminescent Cell Viability Assay kit. \*\*\*P<0.0001 by Student's *t*-test. Data are represented as the mean ± SEM of three independent experiments. (c) MDFs from wild-type, *Rip1*<sup>-/-</sup>, *Rip1*<sup>K45A/K45A</sup> and *Rip1*<sup>Δ/Δ</sup> mice were treated with DMSO, TC and TS for 24h and lysates were collected and subjected to western blot analysis of cleaved-PARP, cleaved- Caspase-8, Caspase-3 and β-actin.

**Supplementary Figure S6. *Rip1*<sup>Δ/Δ</sup> MEFs resist necroptosis to the same extent as *Rip1* knockout MEFs.**

(a) MEFs from wild-type and *Rip1*<sup>-/-</sup> mice were treated with DMSO, TC, TCZ and TCZN respectively for 24h. Cell viability was determined by measuring ATP levels using the CellTiter-Glo kit. \*\*P<0.0005, \*\*\*P<0.0001 by Student's *t*-test. Data are represented as the mean ± SEM of three independent experiments. (b) MEFs from wild-type and *Rip1*<sup>-/-</sup> mice were treated with DMSO, TCZ and TCZN respectively for 12h. Cell lysate was collected and subjected to western blot analysis of RIP3, p-RIP3, MLKL, p-MLKL and β-actin levels. (c) MEFs from wild-type and *Rip1*<sup>Δ/Δ</sup> mice were treated with DMSO, TSZ, TSZN, TC, TCZ and TCZN respectively for 24h. Cell viability was determined by measuring intracellular ATP levels with a Cell Titer-Glo Luminescent Cell Viability Assay kit. \*\*\*P<0.0001 by Student's *t*-test. Data are represented as the mean ± SEM of three independent experiments. (d) MEFs from wild-type and *Rip1*<sup>Δ/Δ</sup> mice were treated with DMSO, TSZ and TSZN respectively for 12h. Cell lysate was collected and subjected to western blot analysis of RIP3, p-RIP3, MLKL, p-MLKL and β-actin levels.

**Supplementary Figure S7. *Rip1*<sup>Δ/Δ</sup> MDFs are more resistant to necroptosis than *Rip1*<sup>K45A/K45A</sup> cells, but *Fadd*<sup>-/-</sup>*Rip1*<sup>Δ/Δ</sup> MEFs undergo spontaneous cell death.**

(a) Microscopic photographs of *Rip1*<sup>Δ/Δ</sup> and *Fadd*<sup>-/-</sup>*Rip1*<sup>Δ/Δ</sup> MEFs. Scale bar, 10μm. Control cells are *Rip1*<sup>Δ/Δ</sup>. (b) MDFs with Indicated genotypes were treated with

different concentration of TNF- $\alpha$  plus Smac (500nM)/ZVAD respectively for 12 hours. Cell viability was determined by measuring intracellular ATP levels with a Cell Titer-Glo Luminescent Cell Viability Assay kit. \*P<0.001 by Student's *t*-test. Data are represented as the mean  $\pm$  SEM of three independent experiments.

# Supplementary Figure S1

**a**

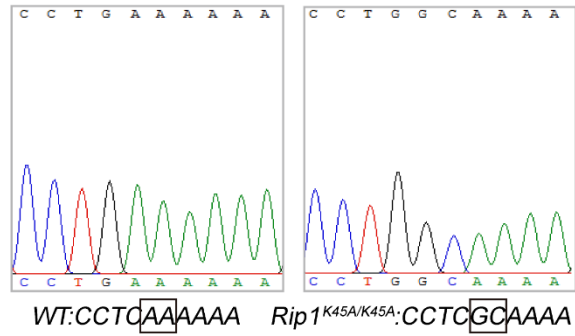

**c**

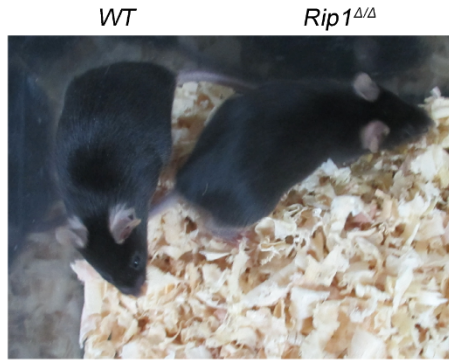

**b**

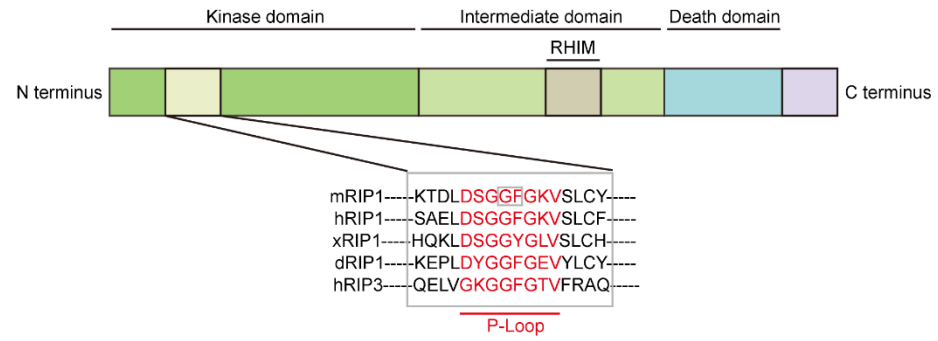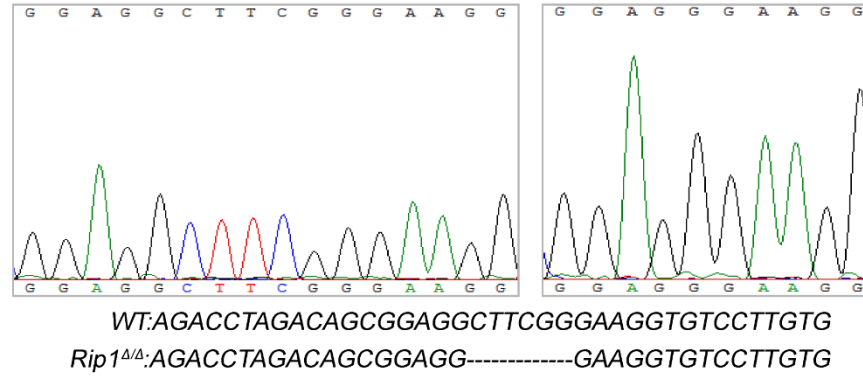

**d**

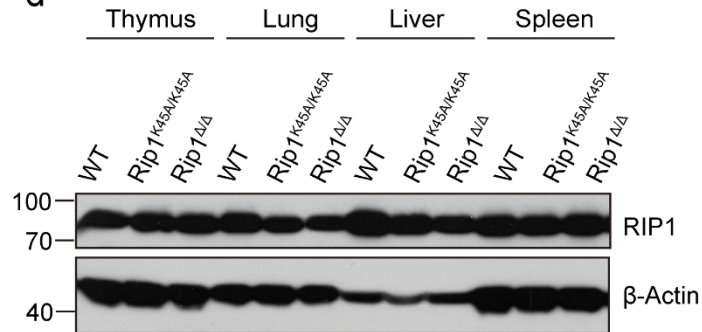

# Supplementary Figure S2

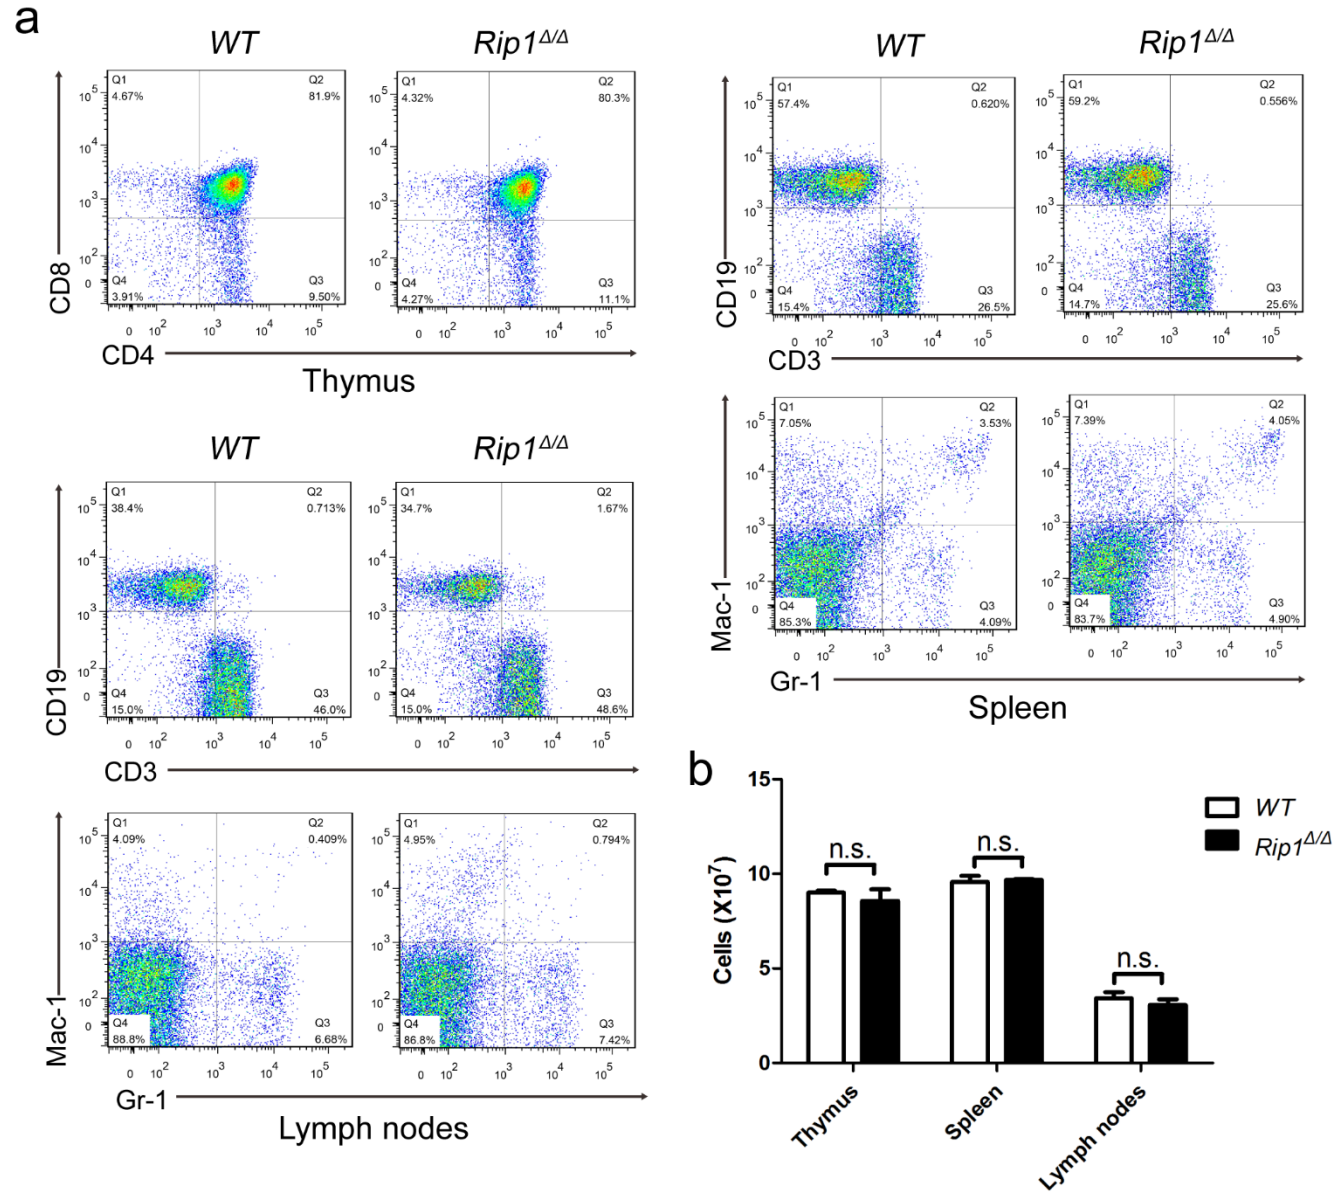

## Supplementary Figure S3

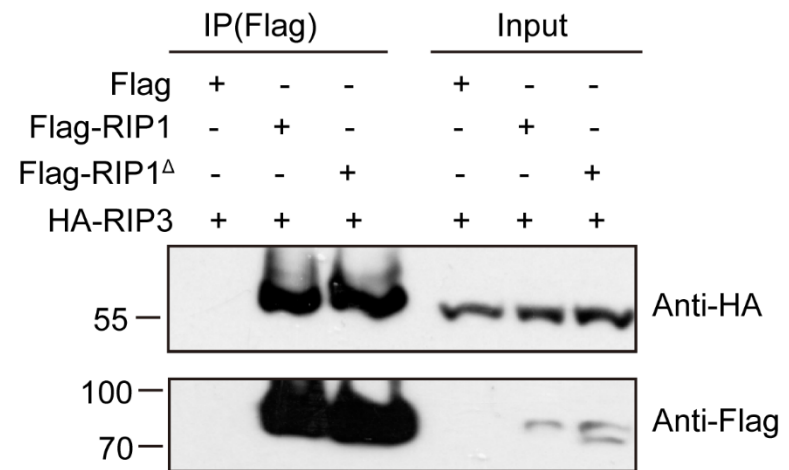



# Supplementary Figure S5

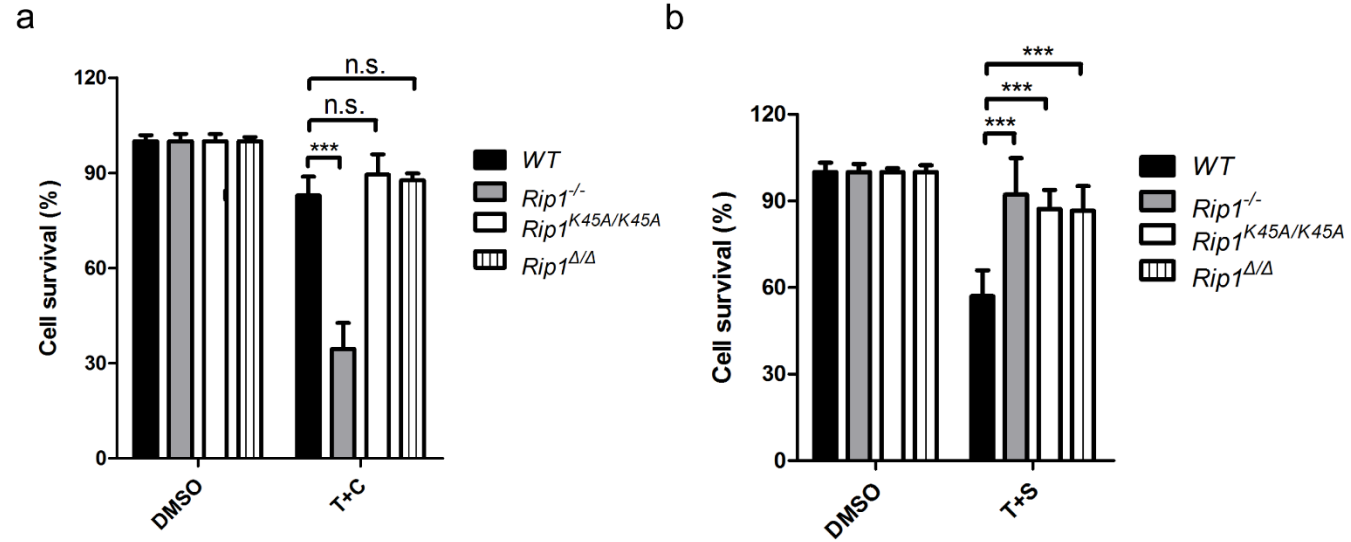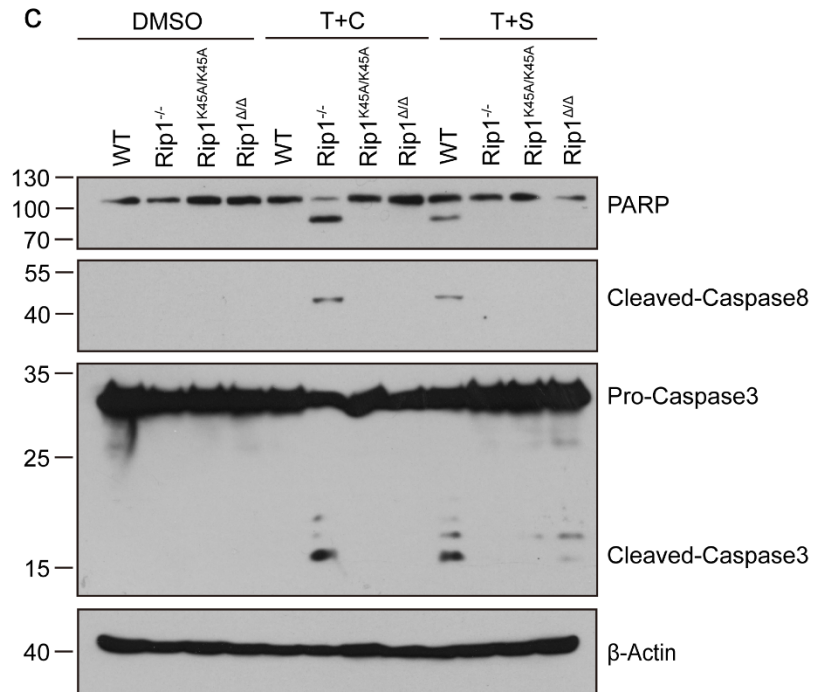



# Supplementary Figure S6

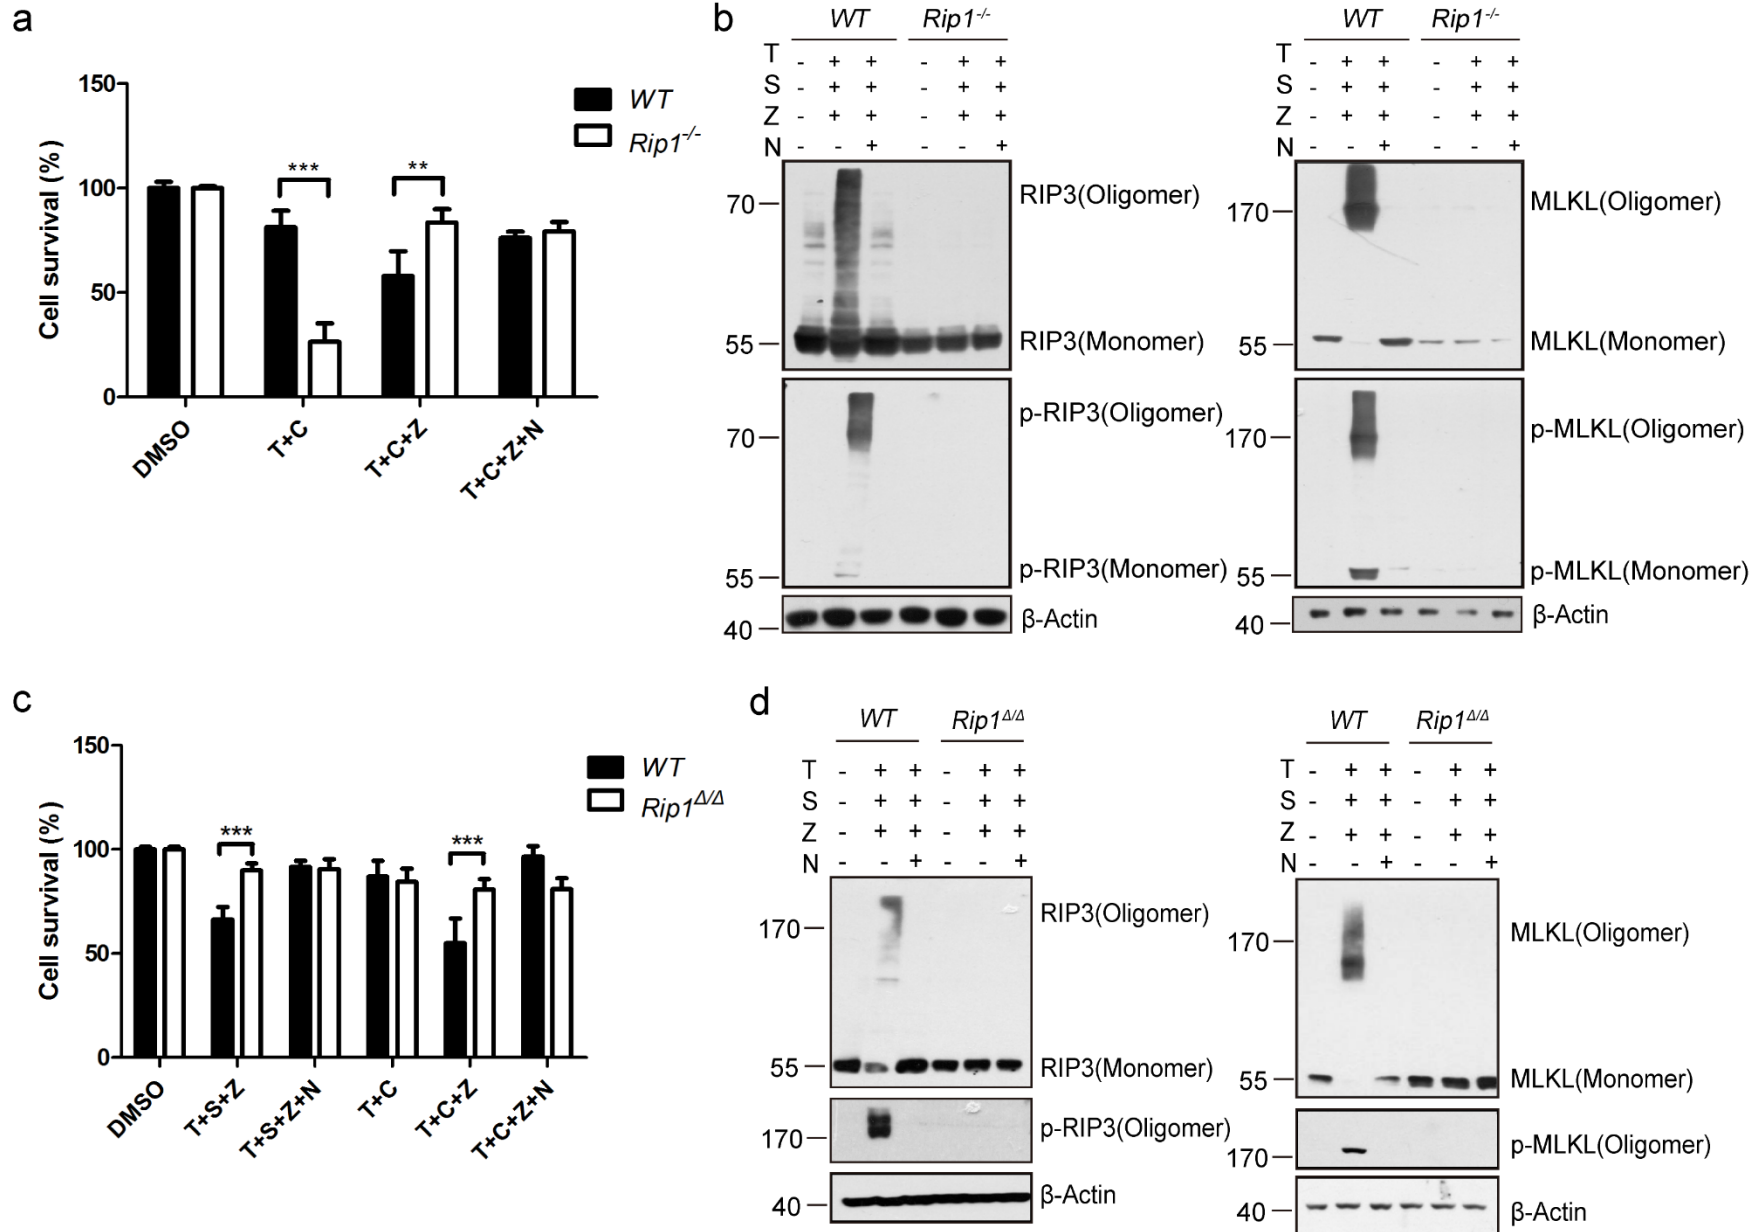

## Supplementary Figure S7

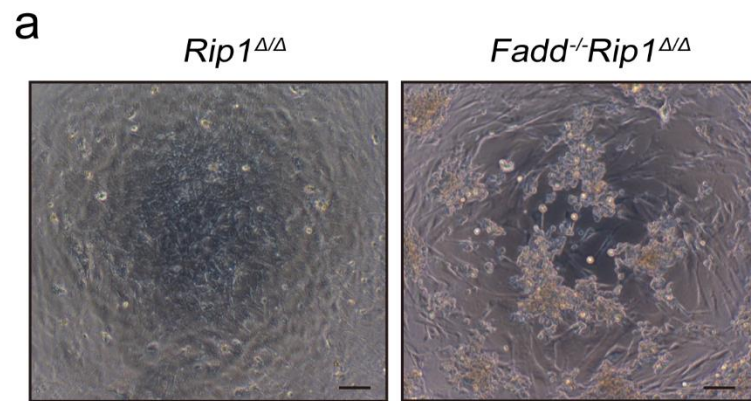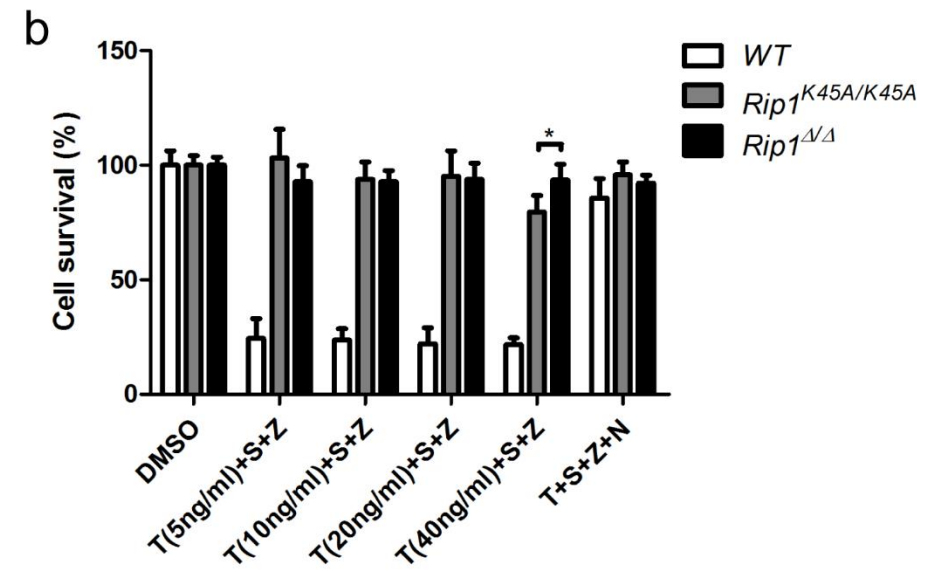

Supplement: cdd201778x1.pdf [file cdd201778x1.pdf]
